# Supplementary material for: ApoE expression in macrophages communicates immunometabolic signaling that controls hyperlipidemia‐driven hematopoiesis & inflammation via extracellular vesicles
Source: PubMed Central journal article supplement — J Extracell Vesicles. 2023 Aug 18;12(8):e12345. doi: 10.1002/jev2.12345 (PMC10436255; doi:10.1002/jev2.12345), 2023-08-18
Supplement: JEV2-12-e12345-s001.pdf [file JEV2-12-e12345-s001.pdf]

## SUPPLEMENTAL FIGURES

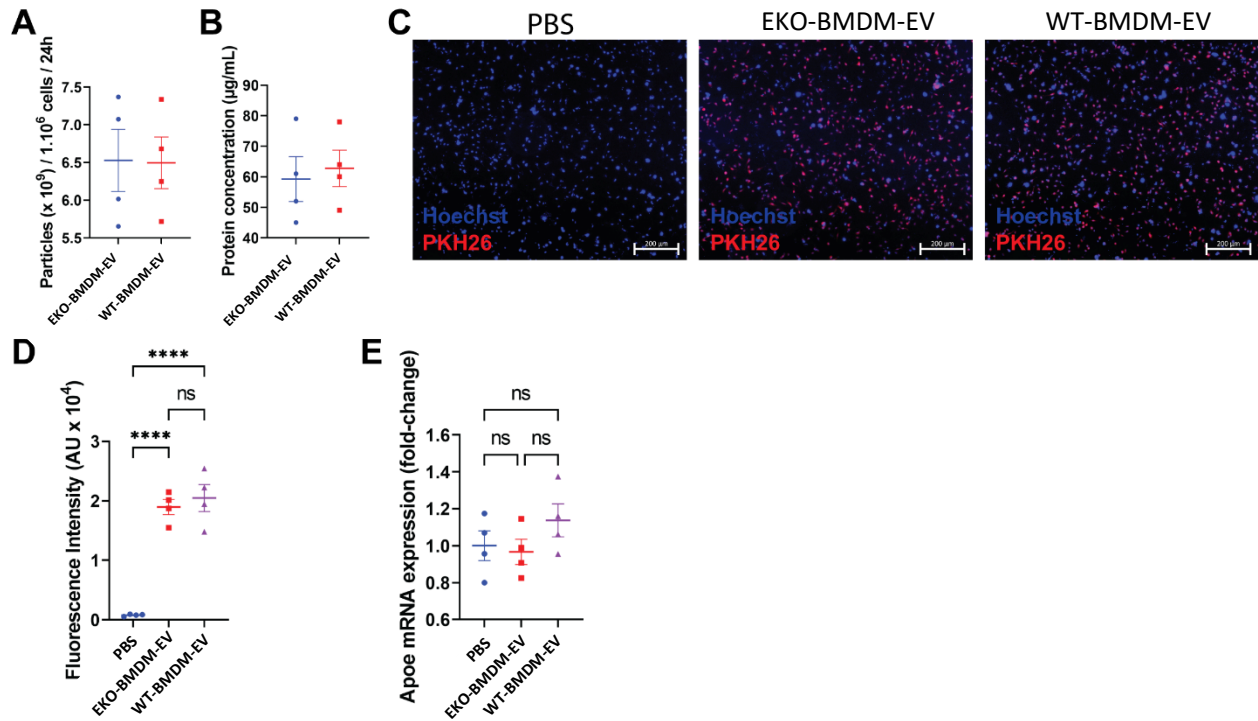

**Figure S1. Characterization and *in vitro* uptake of BMDM EVs in recipient macrophages.**

(A) EVs secretion rate ( $\times 10^9$  particles) per million cells over a 24-hour incubation period as detected by NTA. (B) Protein measurements in EV-containing fractions isolated from conditioned media of BMDM macrophages.  $n = 4$  per group. (C-D) Merged images (C) and quantification (D) of the internalization of PKH26-labeled BMDM-derived EVs by naive primary BMDM counterstained with Hoechst (blue). BMDM were co-incubated with  $2 \times 10^9$  PKH26-labeled EVs for 2 h at  $37^\circ\text{C}$  and washed repeatedly to remove unbound EVs. All images were acquired using a Zeiss Axio microscope system with a 20x objective ( $n = 4$  samples per group, representative of two independent experiments). Scale bar:  $100 \mu\text{m}$ . (E) qRT-PCR analysis of *Apoe* mRNA expression in wildtype BMDM exposed to  $2 \times 10^9$  particles of EKO-BMDM-EV, WT-BMDM-EV, or PBS for 18 hours. qRT-PCR results were normalized to *B2m* or *Gapdh*. One representative experiment out of three independent replicates is shown for all

experiments; n = 4 per group. \*p < 0.05, \*\*p < 0.01, \*\*\*p < 0.001, and \*\*\*\*p < 0.0001 as determined using one-way ANOVA followed by Holm-Sidak post-test. Data are presented as mean  $\pm$  SEM.

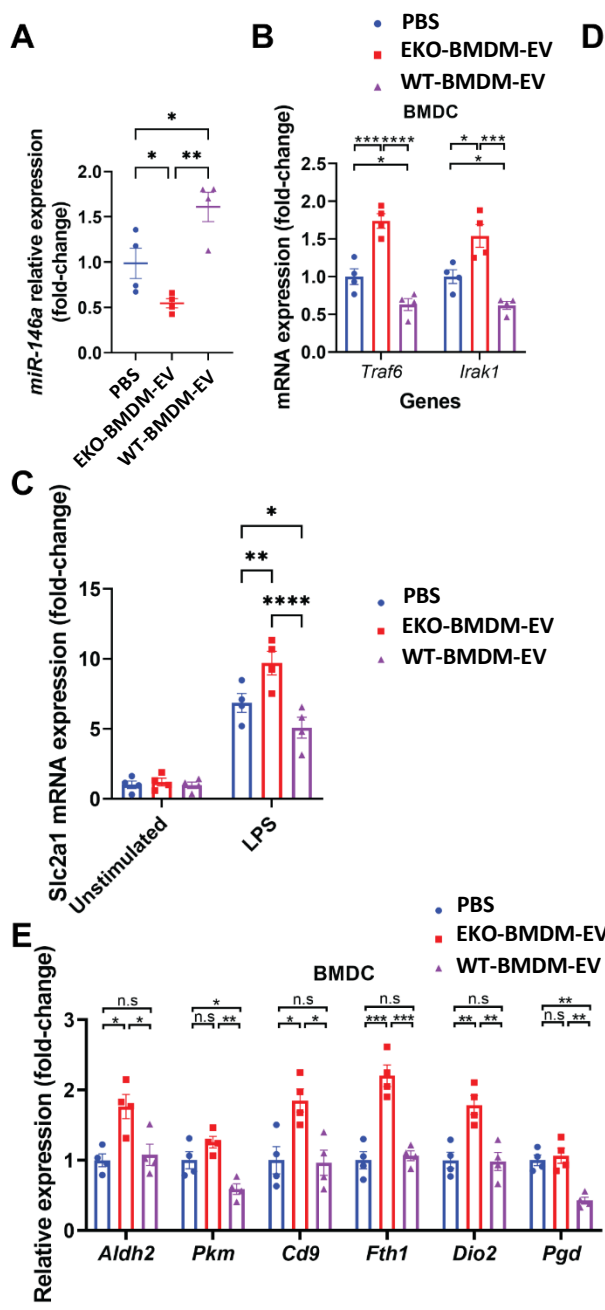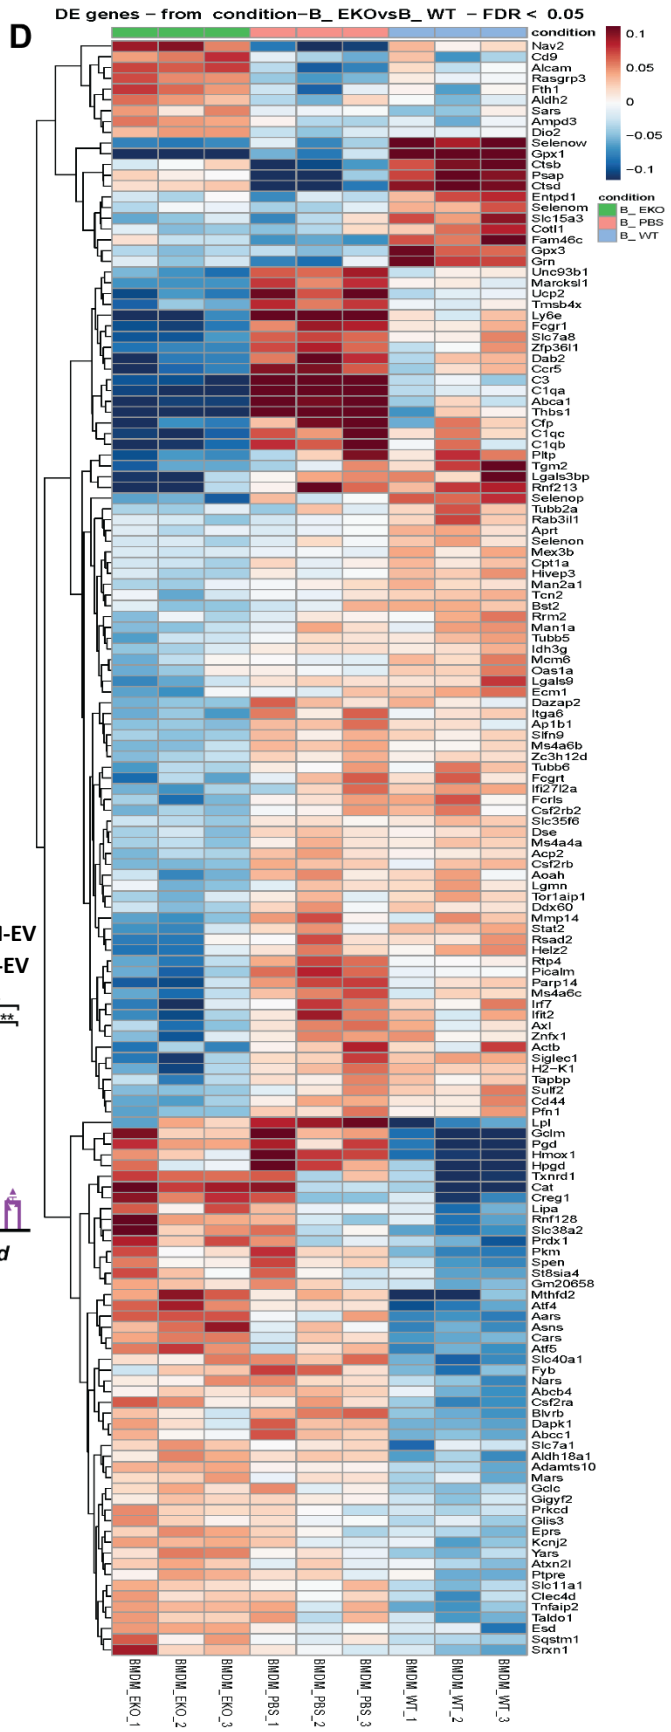

**Figure S2. ApoE expression dictates the capacity for macrophage EVs to downregulate the expression of genes involved in glucose uptake and glycolytic activity in recipient BMDC.**

**(A)** qRT-PCR analysis of miR-146a-5p expression in wildtype BMDC exposed to  $2 \times 10^9$  particles of EKO-BMDM-EV, WT-BMDM-EV, or PBS for 18 hours. **(B)** qRT-PCR analysis of *Irak1* and *Traf6* mRNA levels in wildtype BMDC exposed to  $2 \times 10^9$  particles of EKO-BMDM-EV, WT-BMDM-EV, or PBS for 18 hours and subsequently stimulated with LPS (100 ng/mL) for 6 hours. **(C)** qRT-PCR analysis of *Slc2a1* mRNA expression in wildtype BMDC exposed to  $2 \times 10^9$  particles of EKO-BMDM-EV, WT-BMDM-EV, or PBS for 18 hours and subsequently cultured in basal or LPS-stimulated condition (100 ng/mL) for 6 hours. **(D)** Annotated heatmap showing the distinct mRNA expression profiles between wildtype BMDM exposed to  $2 \times 10^9$  particles of EKO-BMDM-EV, WT-BMDM-EV, or PBS for 18 hours ( $n = 3$  per group,  $p < 0.05$ ). **(E)** qRT-PCR analysis of *Aldh2*, *Pkm*, *Cd9*, *Fth1*, *Dio2*, and *Pgd* mRNA expression in wildtype BMDC exposed to  $2 \times 10^9$  particles of EKO-BMDM-EV, WT-BMDM-EV, or PBS for 18 hours. qRT-PCR results were normalized to *B2m* or *Gapdh* for mRNA analysis and U6 snRNA or miR-16-5p for microRNA analysis. One representative experiment out of three independent replicates is shown for all experiments;  $n = 4$  per group. \* $p < 0.05$ , \*\* $p < 0.01$ , \*\*\* $p < 0.001$ , and \*\*\*\* $p < 0.0001$  as determined using one-way ANOVA followed by Holm-Sidak post-test. Data are presented as mean  $\pm$  SEM.

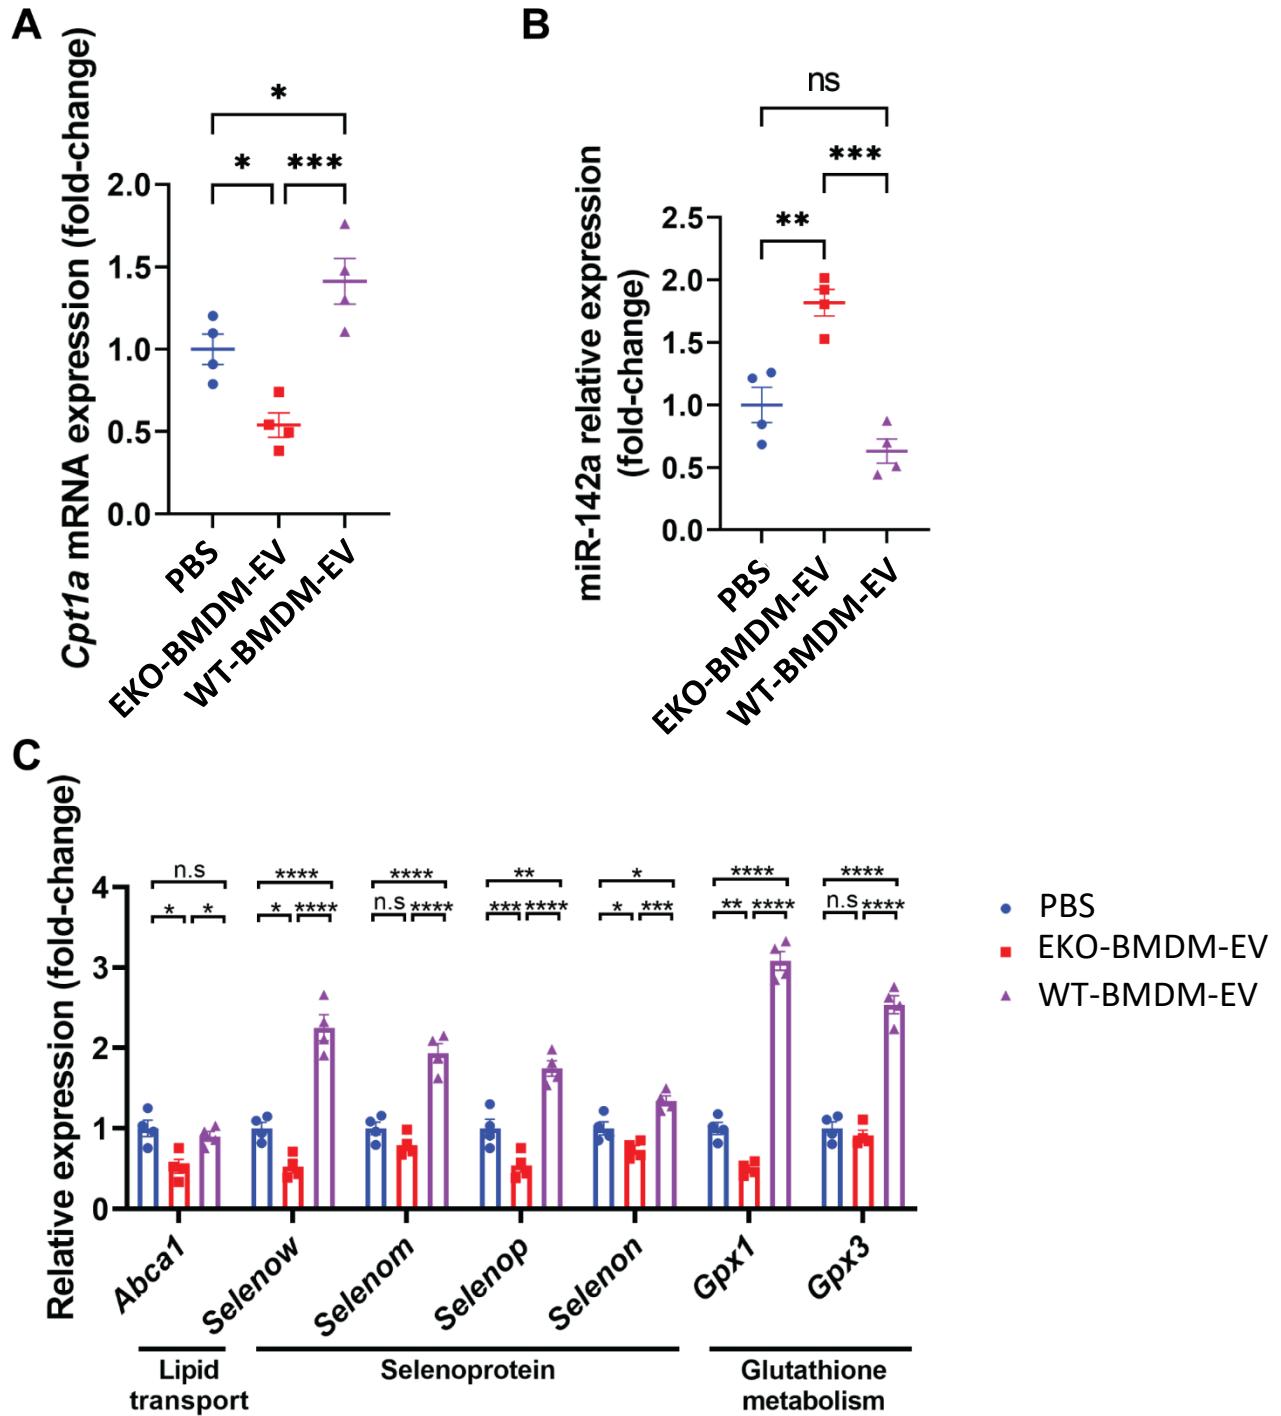

**Figure S3. ApoE expression dictates the capacity for macrophage EVs to enhance the expression of genes involved in FAO, OxPHOS, lipid transport, and oxidative stress response in recipient BMDC. (A)** qRT-PCR analysis of *Cpt1a* mRNA expression in wildtype

BMDC exposed to  $2 \times 10^9$  particles of EKO-BMDM-EV, WT-BMDM-EV, or PBS for 18 hours. **(B)** qRT-PCR analysis of miR-142a-3p expression in wildtype BMDC exposed to  $2 \times 10^9$  particles of EKO-BMDM-EV, WT-BMDM-EV, or PBS for 18 hours. **(C)** qRT-PCR analysis of *Abca1*, *Selenow*, *Selenom*, *Selenop*, *Selenon*, *Gpx1* and *Gpx3* mRNA expression in wildtype BMDC exposed to  $2 \times 10^9$  particles of EKO-BMDM-EV, WT-BMDM-EV, or PBS for 18 hours. qRT-PCR results were normalized to *B2m* or *Gapdh* for mRNA analysis and U6 snRNA or miR-16-5p for microRNA analysis. One representative experiment out of three independent replicates is shown for all experiments; n = 4 per group. \*p < 0.05, \*\*p < 0.01, \*\*\*p < 0.001, and \*\*\*\*p < 0.0001 as determined using one-way ANOVA followed by Holm-Sidak post-test. Data are presented as mean  $\pm$  SEM.

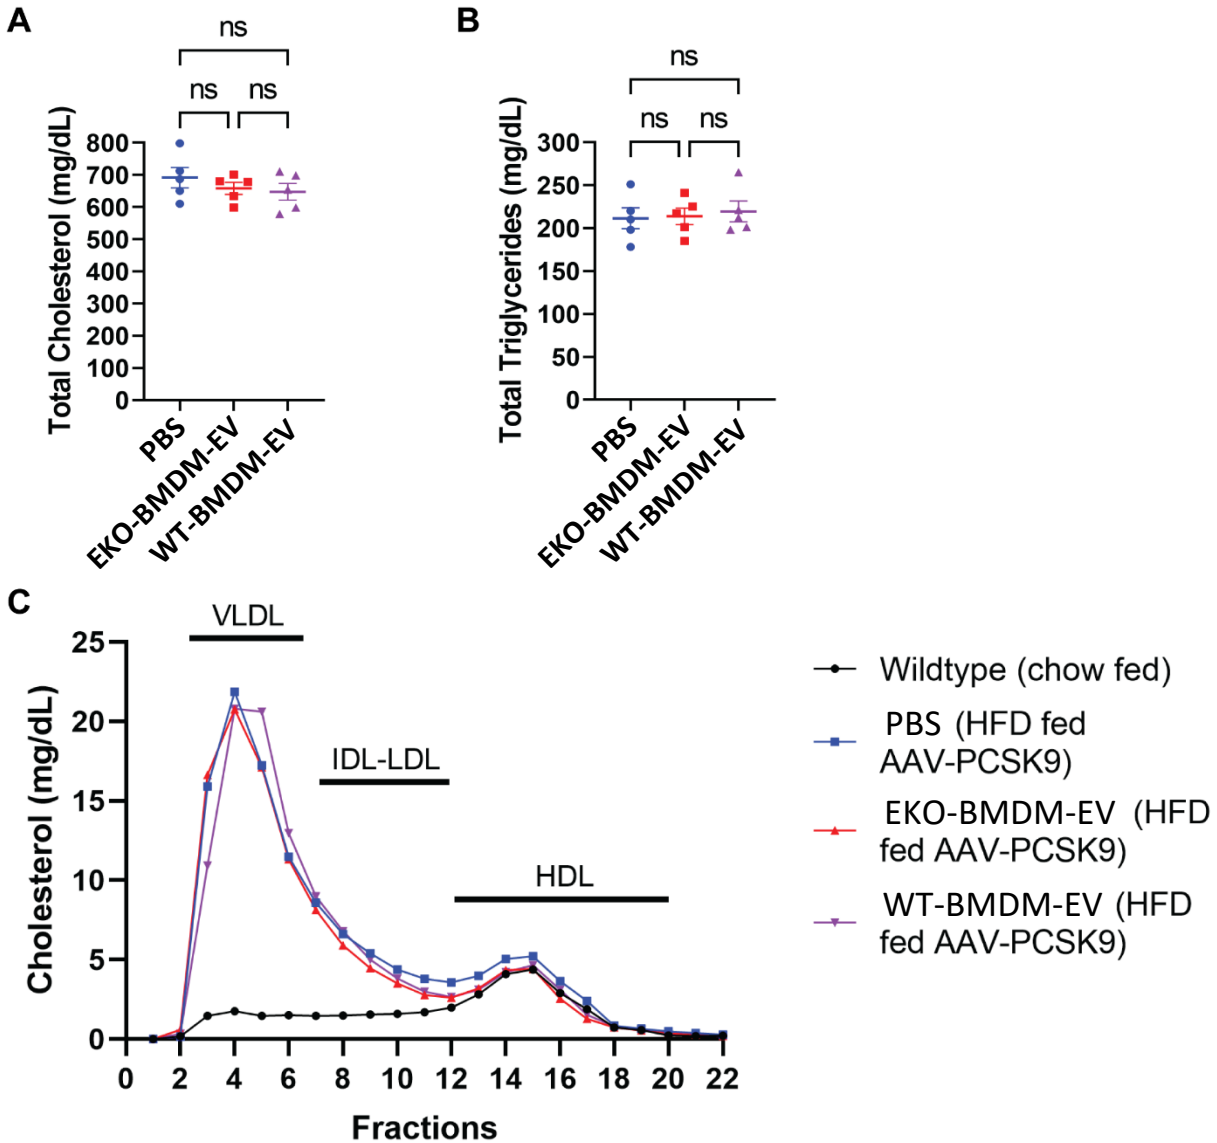

**Figure S4. Lipid profiles of Western diet-fed AAV-PCSK9 mice infused with EKO-BMDM-EV, WT-BMDM-EV, or PBS. (A-B)** Fasting plasma cholesterol (A) and triglycerides (B) in Western diet-fed AAV-PCSK9-injected mice repeatedly infused with  $1 \times 10^{10}$  particles of EKO-BMDM-EV, WT-BMDM-EV, or PBS. **(C)** Cholesterol measurements in FPLC fractions from collected plasma of Western diet-fed AAV-PCSK9-injected mice repeatedly infused with  $1 \times 10^{10}$  particles of EKO-BMDM-EV, WT-BMDM-EV, or PBS. One representative experiment out of two independent replicates is shown for all experiments;  $n = 5$  per group. \* $p < 0.05$ , \*\* $p <$

0.01, \*\*\* $p < 0.001$ , and \*\*\*\* $p < 0.0001$  as determined using one-way ANOVA followed by Holm-Sidak post-test. Data are presented as mean  $\pm$  SEM.



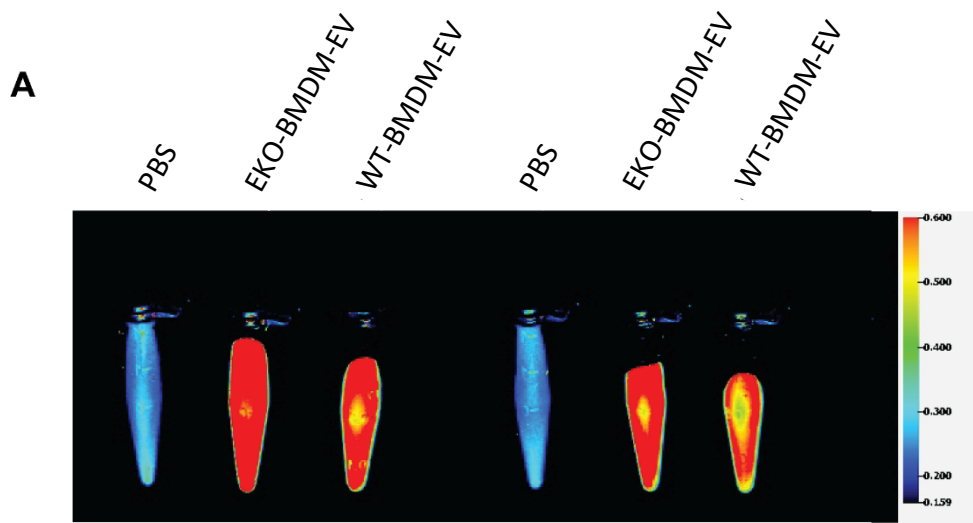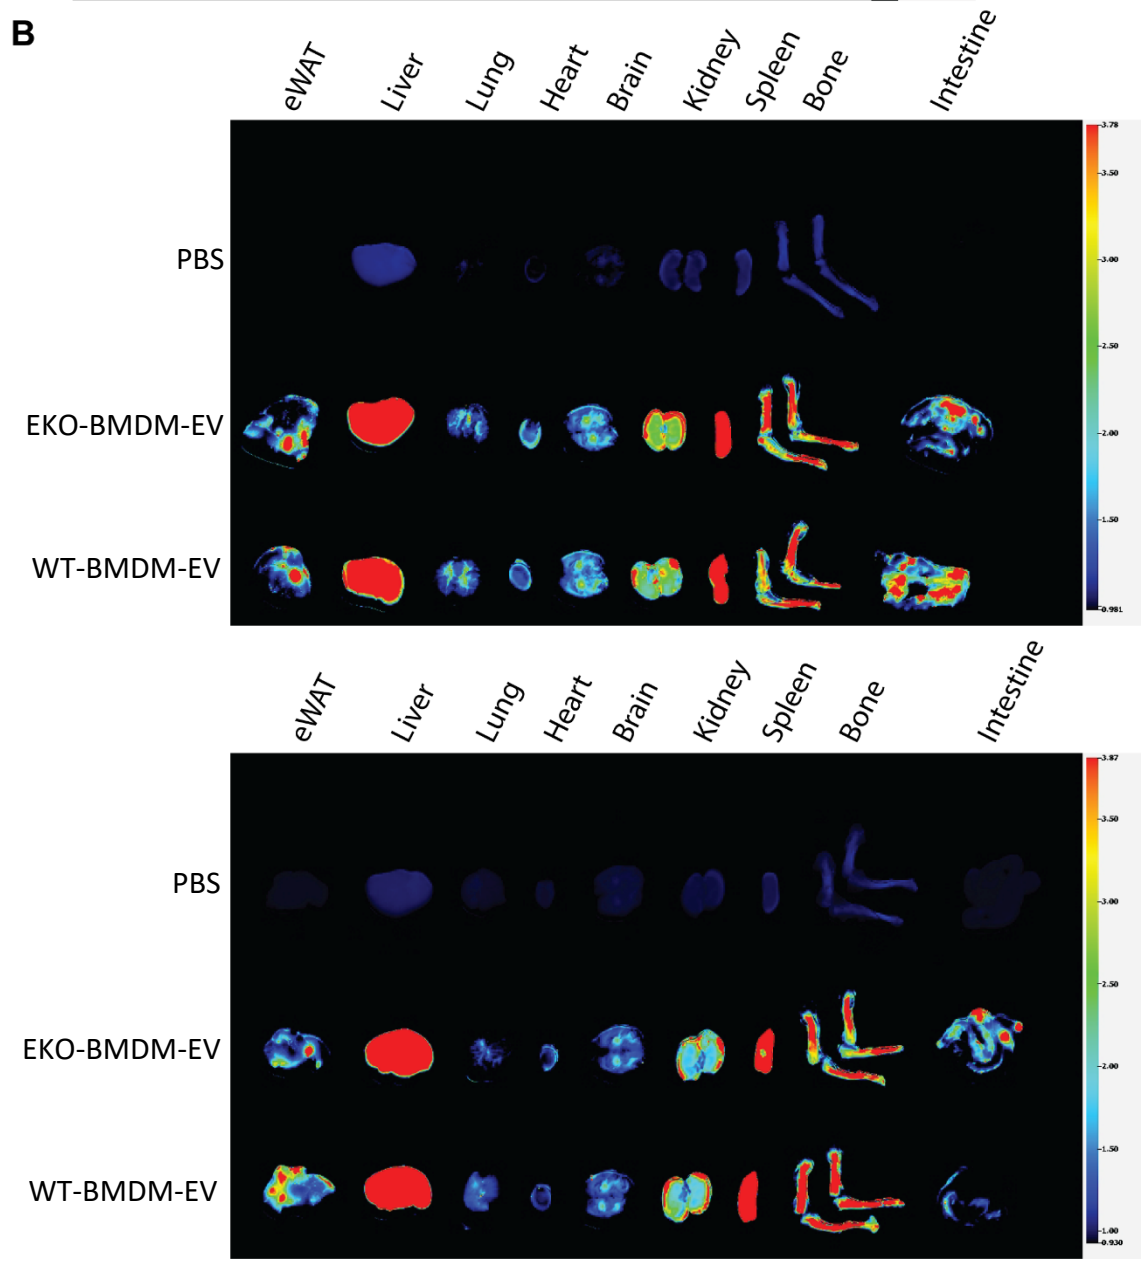

**Figure S5. Biodistribution of DiR-labeled BMDM EVs upon infusion into Western diet-fed AAV-PCSK9 mice. (A-B)** Images of DiR fluorescence in blood (A) and organs (B) 6 h post-injection from 8-week-old Western diet-fed AAV-PCSK9-injected mice infused i.p. with PBS as control or  $1 \times 10^{10}$  particles of EKO-BMDM-EV or WT-BMDM-EV.

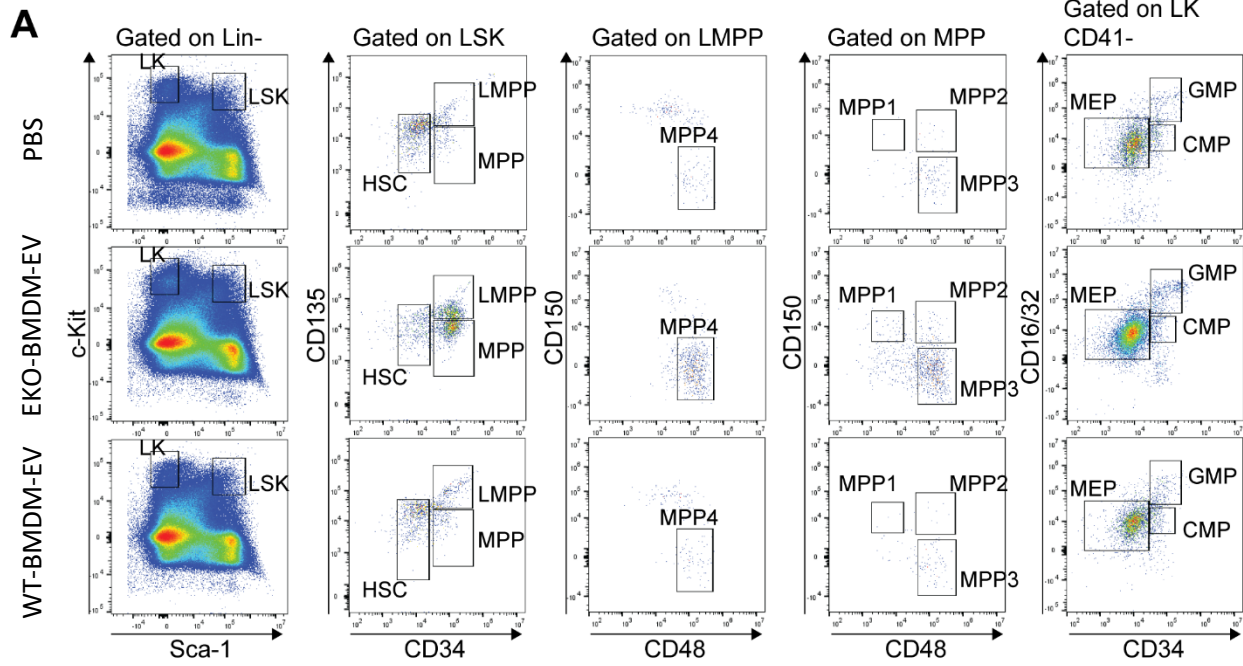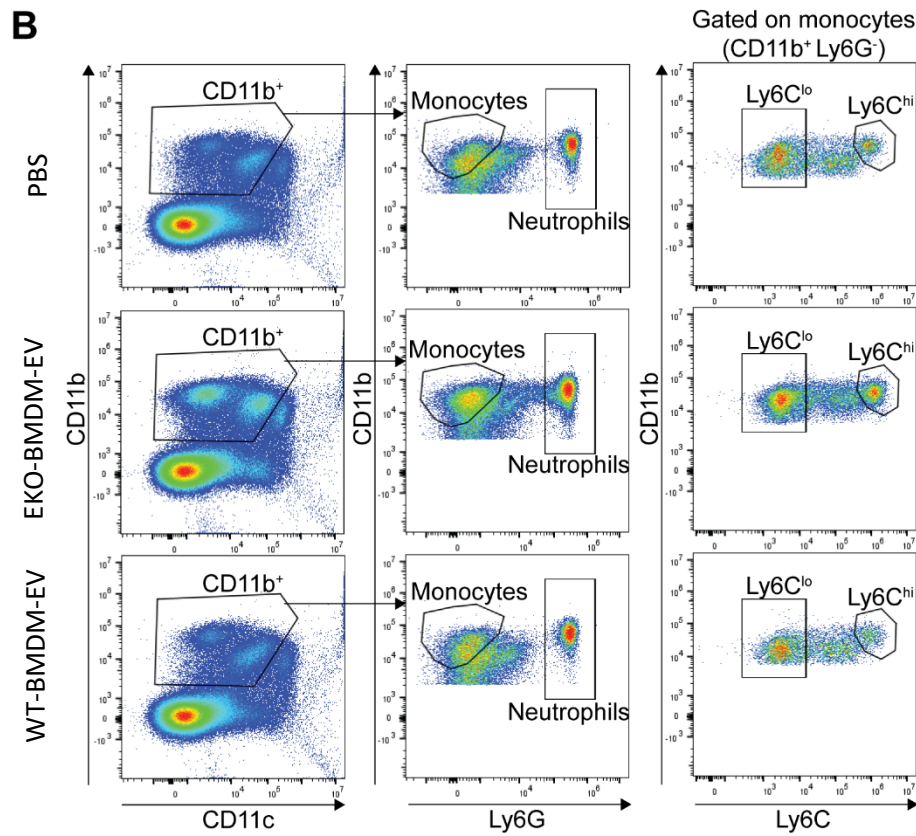

**Figure S6. Gating strategy for flow cytometric analysis of splenic HSPC and myeloid cells.**

**(A-B).** Representative flow cytometry plots of splenic hematopoietic stem/progenitor cell subsets

(A) and myeloid cell subsets (B).

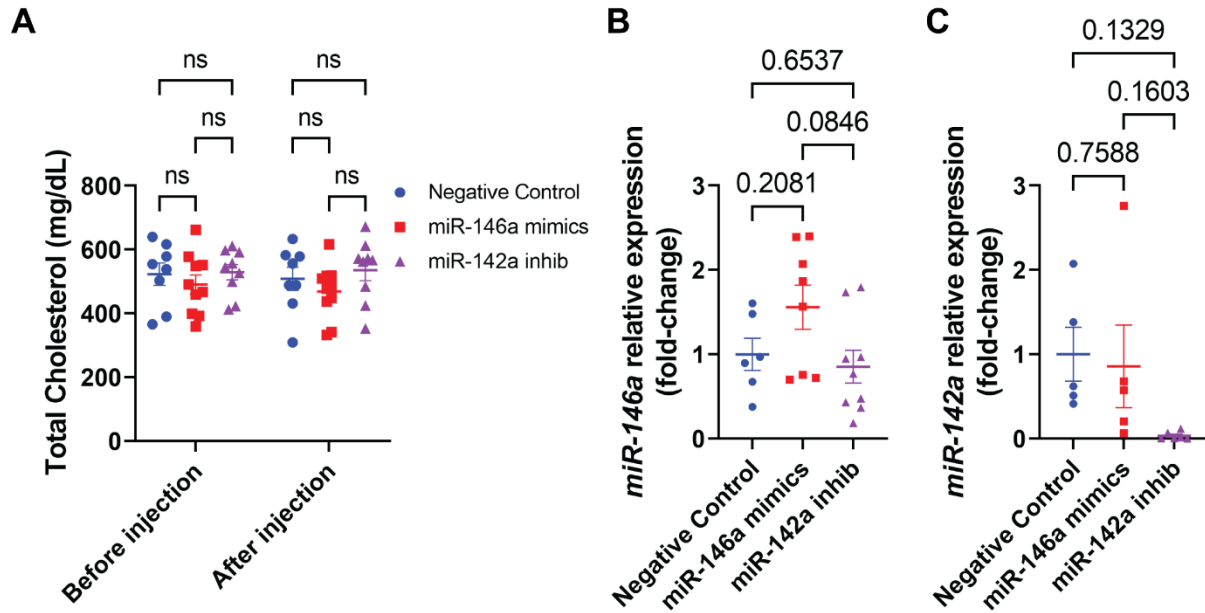

**Figure S7. Infusions of RNA oligonucleotides regulated cellular miR-146a-5p and miR-142a-3p without altering plasma cholesterol levels. (A)** Fasting plasma cholesterol in Western diet-fed *Apoe*<sup>-/-</sup> mice repeatedly infused with 1 nmol of miR-146a mimics, miR-142a inhibitors, or negative control. **(B-C)** qRT-PCR analysis of miR-146a-5p (B) and miR-142a-3p (C) expression in peritoneal macrophages of Western diet-fed *Apoe*<sup>-/-</sup> mice repeatedly infused with 1 nmol of miR-146a mimics, miR-142a inhibitors, or negative control. Pooled data from two independent replicates is shown for all experiments; n = 5-10 per group. \*p < 0.05, \*\*p < 0.01, \*\*\*p < 0.001, and \*\*\*\*p < 0.0001 as determined using one-way ANOVA followed by Holm-Sidak post-test. Data are presented as mean ± SEM.
